# Supplementary material for: Factors Associated with Thoughts of Self-Harm or Suicide among Aboriginal and Torres Strait Islander People Presenting to Urban Primary Care: An Analysis of De-Identified Clinical Data
Source: MDPI journal article supplement (doi:10.3390/ijerph19010153), 2021-12-23
Supplement: s1 [file s1]

## Supplementary Materials

**Table S1.** Summary of Health Assessment prompts, responses and the outcome analysed.

| Explanatory Variable             | Health Assessment Prompt                                                                                                                                                     | Health Assessment Responses                                                             | Outcome Analysed                                                                                                                                                                                                                     |
|----------------------------------|------------------------------------------------------------------------------------------------------------------------------------------------------------------------------|-----------------------------------------------------------------------------------------|--------------------------------------------------------------------------------------------------------------------------------------------------------------------------------------------------------------------------------------|
| Sex                              | Sex auto-populates from client's medical record                                                                                                                              | Male, Female, Missing                                                                   | Male, Female                                                                                                                                                                                                                         |
| Age                              | Age is automatically calculated by subtracting the date of birth from the date of the visit when the Health Assessment is completed                                          | Age                                                                                     | 15–24 years, 25–34 years, 35–44 years, 55 years and above                                                                                                                                                                            |
| Ethnicity                        | Ethnicity                                                                                                                                                                    | Aboriginal, Aboriginal & Torres Strait Islander, Torres Strait Islander, Other, Missing | Aboriginal, Aboriginal & Torres Strait Islander, Torres Strait Islander                                                                                                                                                              |
| Education                        | Level completed                                                                                                                                                              | Year 10 or less, Year 11–12, TAFE, University, Not stated, missing                      | Year 10 or less (year 10 or less), Year 11 or more (year 11–12, TAFE, university)                                                                                                                                                    |
| Smoking                          | Never smoked<br>Ex-smoker<br>Current smoker                                                                                                                                  | Yes, No, Missing<br>Yes, No, Missing<br>Yes, No, Missing                                | Current smoker, Non-smoker, Missing                                                                                                                                                                                                  |
| Alcohol                          | How often do you have a drink containing alcohol?<br>When you have a drink, how many do you usually have in one day?<br>How often do you have six or more drinks in one day? | AUDIT-C [1] score calculated from health assessment prompts, Missing                    | Yes (if AUDIT-C $\geq 3$ for women AUDIT-C $\geq 4$ for men), No (if AUDIT-C $< 3$ for women AUDIT-C $< 4$ for men), Missing                                                                                                         |
| Substance use                    | Other drugs<br>Opiates (heroin, methadone, codeine, endone, MS contin)<br>Cannabis/Yarndi<br>Amphetamines (speed, base, crystal meth, ice, ecstasy, MDMA)                    | Yes, No, Missing<br>Yes, No, Missing<br>Yes, No, Missing<br>Yes, No, Missing            | Not analysed independently<br>Yes, No (if opiates = 'no' and other drugs = 'no'), Missing<br>Yes, No (if cannabis/yarndi = 'no' and other drugs = 'no'), Missing<br>Yes, No (if amphetamines = 'no' and other drugs = 'no'), Missing |
| Exercise                         | How many days per week do you do 30 minutes of huffing and puffing physical activity?                                                                                        | 0–7                                                                                     | 0 days per week, $\geq 1$ days per week, Missing                                                                                                                                                                                     |
| Participation in a regular sport | Do you play any regular sport?                                                                                                                                               | Yes, No, Missing                                                                        | Yes, No, Missing                                                                                                                                                                                                                     |
| Incarceration                    | Incarceration history                                                                                                                                                        | Yes, No, Missing                                                                        | Yes, No, Missing                                                                                                                                                                                                                     |
| Carer status                     | Number of children<br>Are you a single parent?<br>Are you cared for by someone else                                                                                          | Number of children, Missing<br>Yes, No, Missing<br>Yes, No, Missing                     | 0 children, $\geq 1$ child, Missing<br>Yes, No, Missing<br>Yes, No, Missing                                                                                                                                                          |
| Employment                       | Unemployed                                                                                                                                                                   | Yes, No, Missing                                                                        |                                                                                                                                                                                                                                      |

|                                             |                                                                                     |                  |                                                                                                                                                                              |
|---------------------------------------------|-------------------------------------------------------------------------------------|------------------|------------------------------------------------------------------------------------------------------------------------------------------------------------------------------|
|                                             | Employed full-time                                                                  | Yes, No, Missing | Full-time employed (if employed full-time = 'yes')                                                                                                                           |
|                                             | employed part-time                                                                  | Yes, No, Missing |                                                                                                                                                                              |
|                                             | Casual                                                                              | Yes, No, Missing | Part-time employed (if employed part-time = 'yes' and employed full-time ≠ 'yes')                                                                                            |
|                                             | Contract work                                                                       | Yes, No, Missing | Casual/contract only (if employed casual = 'yes' or employed contract = 'yes' and employed full-time or part-time ≠ 'yes' and studying full-time or part-time ≠ 'yes')       |
|                                             | Voluntary work                                                                      | Yes, No, Missing |                                                                                                                                                                              |
|                                             | Full-time study                                                                     | Yes, No, Missing |                                                                                                                                                                              |
|                                             | Part-time study                                                                     | Yes, No, Missing |                                                                                                                                                                              |
|                                             | Home duties                                                                         | Yes, No, Missing |                                                                                                                                                                              |
|                                             | Disability pension                                                                  | Yes, No, Missing | Other (if employed full-time or part-time ≠ 'yes' and employed casual or contract ≠ 'yes' and at least one of the remaining variables was indicated with 'yes')              |
|                                             | Other pension                                                                       | Yes, No, Missing |                                                                                                                                                                              |
| Homelessness                                | Homelessness                                                                        | Yes, No, Missing | Yes, No, Missing                                                                                                                                                             |
|                                             | Have you experienced any of the following in the last 12 months?                    |                  |                                                                                                                                                                              |
|                                             | Serious accident?                                                                   | Yes, No, Missing | Yes, No (if serious accident = 'no' or serious accident = 'missing' and no reported stressors = 'yes'), Missing                                                              |
|                                             | Death of a family member or close friend?                                           | Yes, No, Missing | Yes, No (if death of a family member or close friend = 'no' or death of a family member or close friend = 'missing' and no reported stressors = 'yes'), Missing              |
|                                             | Divorce or separation?                                                              | Yes, No, Missing | Yes, No (if divorce or separation = 'no' or divorce or separation = 'yes'), Missing                                                                                          |
|                                             | Not able to get a job?                                                              | Yes, No, Missing | Yes, No (if not able to get a job = 'no' or not able to get a job = 'no' and no reported stressors = 'yes'), Missing                                                         |
| Adapted Negative Life Event Scale (NLES)[2] | Witness to violence?                                                                | Yes, No, Missing | Yes, No (if witness to violence = 'no' or witness to violence = 'no' and no reported stressors = 'yes'), Missing                                                             |
|                                             | Trouble with the police?                                                            | Yes, No, Missing | Yes, No (if trouble with the police = 'no' or trouble with the police = 'no' and no reported stressors = 'yes'), Missing                                                     |
|                                             | Gambling problems?                                                                  | Yes, No, Missing | Yes, No (if gambling problems = 'no' or gambling problems = 'no' and no reported stressors = 'yes'), Missing                                                                 |
|                                             | Member of family sent to jail / currently in jail?                                  | Yes, No, Missing | Yes, No (if member of family sent to jail / currently in jail = 'no' or member of family sent to jail / currently in jail = 'no' and no reported stressors = 'yes'), Missing |
|                                             | Overcrowding at home?                                                               | Yes, No, Missing | Yes, No (if overcrowding = 'no' or overcrowding = 'no' and no reported stressors = 'yes'), Missing                                                                           |
|                                             | Racism or discrimination                                                            | Yes, No, Missing | Yes, No (if racism or discrimination = 'no' or racism or discrimination = 'no' and no reported stressors = 'yes'), Missing                                                   |
|                                             | No reported stressors?                                                              | Yes, No, Missing | Not analysed independently                                                                                                                                                   |
| Community involvement                       | Have you participated in a community or cultural activity within the last 12 months | Yes, No, Missing | Yes, No, Missing                                                                                                                                                             |

**Table S2.** Distribution of patient demographics and potential factors at their first Health Assessment within the study period, overall and partitioned by thoughts of self-harm or suicide.

|                                                    | Overall  |        | Thoughts of Self-Harm or Suicide < 2weeks |        |          |        |
|----------------------------------------------------|----------|--------|-------------------------------------------|--------|----------|--------|
|                                                    |          |        | No                                        |        | Yes      |        |
|                                                    | <i>n</i> | (%)    | <i>n</i>                                  | (%)    | <i>n</i> | (%)    |
| <i>Sex</i>                                         |          |        |                                           |        |          |        |
| Female                                             | 937      | (50.6) | 722                                       | (83.4) | 114      | (13.6) |
| Male                                               | 914      | (49.4) | 749                                       | (90.7) | 77       | (9.3)  |
| <i>Age group (years)</i>                           |          |        |                                           |        |          |        |
| 15–24                                              | 521      | (28.1) | 416                                       | (84.6) | 76       | (15.4) |
| 25–34                                              | 335      | (18.1) | 287                                       | (91.1) | 28       | (8.9)  |
| 35–44                                              | 320      | (17.3) | 267                                       | (89.9) | 30       | (10.1) |
| 45–54                                              | 344      | (18.6) | 288                                       | (87.0) | 43       | (13.0) |
| ≥55                                                | 333      | (18.0) | 215                                       | (93.9) | 14       | (6.1)  |
| <i>Ethnic identification</i>                       |          |        |                                           |        |          |        |
| Aboriginal                                         | 1691     | (91.3) | 1343                                      | (88.5) | 175      | (11.5) |
| Torres Strait Islander                             | 60       | (3.2)  | 45                                        | (91.8) | 4        | (8.2)  |
| Both <sup>a</sup>                                  | 102      | (5.5)  | 85                                        | (87.6) | 12       | (12.4) |
| <i>Education level</i>                             |          |        |                                           |        |          |        |
| Year 10 of less                                    | 807      | (50.4) | 636                                       | (90.3) | 68       | (9.7)  |
| Year 11 or more                                    | 794      | (49.6) | 657                                       | (88.1) | 89       | (11.9) |
| <i>Employment</i>                                  |          |        |                                           |        |          |        |
| Full-time employed                                 | 415      | (22.7) | 354                                       | (93.9) | 23       | (6.1)  |
| Part-time employed                                 | 125      | (6.8)  | 101                                       | (87.8) | 14       | (12.2) |
| Causal/contract only                               | 62       | (3.4)  | 52                                        | (91.2) | 5        | (8.8)  |
| Other <sup>b</sup>                                 | 1228     | (67.1) | 950                                       | (86.4) | 149      | (13.6) |
| <i>Homelessness</i>                                |          |        |                                           |        |          |        |
| No                                                 | 1487     | (95.8) | 1213                                      | (90.1) | 133      | (9.9)  |
| Yes                                                | 65       | (4.2)  | 36                                        | (58.1) | 26       | (41.9) |
| <i>History of incarceration</i>                    |          |        |                                           |        |          |        |
| No                                                 | 1474     | (84.5) | 1194                                      | (89.7) | 137      | (10.3) |
| Yes                                                | 270      | (15.5) | 210                                       | (83.7) | 41       | (16.3) |
| <i>Serious accident &lt;12 months</i>              |          |        |                                           |        |          |        |
| No                                                 | 1534     | (95.5) | 1245                                      | (89.2) | 150      | (10.8) |
| Yes                                                | 72       | (4.5)  | 63                                        | (91.3) | 6        | (8.7)  |
| <i>Death of family/close friend &lt;12 months</i>  |          |        |                                           |        |          |        |
| No                                                 | 966      | (59.5) | 795                                       | (90.3) | 85       | (9.7)  |
| Yes                                                | 657      | (40.5) | 524                                       | (87.0) | 78       | (13.0) |
| <i>Discrimination/racism &lt;12 months</i>         |          |        |                                           |        |          |        |
| No                                                 | 1350     | (85.5) | 1108                                      | (90.7) | 114      | (9.3)  |
| Yes                                                | 229      | (14.5) | 179                                       | (82.5) | 38       | (17.5) |
| <i>Divorce/separation &lt;12 months</i>            |          |        |                                           |        |          |        |
| No                                                 | 1412     | (87.7) | 1149                                      | (89.8) | 131      | (10.2) |
| Yes                                                | 198      | (12.3) | 159                                       | (85.5) | 27       | (14.5) |
| <i>Gambling problems &lt;12 months</i>             |          |        |                                           |        |          |        |
| No                                                 | 1560     | (97.9) | 1272                                      | (89.7) | 146      | (10.3) |
| Yes                                                | 33       | (2.1)  | 23                                        | (71.9) | 9        | (28.1) |
| <i>Family member sent to/in jail &lt;12 months</i> |          |        |                                           |        |          |        |
| No                                                 | 1201     | (74.9) | 970                                       | (90.0) | 108      | (10.0) |
| Yes                                                | 402      | (25.1) | 335                                       | (87.2) | 49       | (12.8) |
| <i>Difficulty getting a job &lt;12 months</i>      |          |        |                                           |        |          |        |
| No                                                 | 987      | (61.0) | 821                                       | (92.6) | 66       | (7.4)  |
| Yes                                                | 631      | (39.0) | 498                                       | (84.8) | 89       | (15.2) |
| <i>In trouble with police &lt;12 months</i>        |          |        |                                           |        |          |        |
| No                                                 | 1145     | (82.4) | 975                                       | (89.9) | 109      | (10.1) |
| Yes                                                | 245      | (17.6) | 196                                       | (82.7) | 41       | (17.3) |

|                                                       |      |        |      |        |     |        |
|-------------------------------------------------------|------|--------|------|--------|-----|--------|
| <i>Overcrowding at home &lt;12 months</i>             |      |        |      |        |     |        |
| No                                                    | 1477 | (92.0) | 1203 | (89.9) | 135 | (10.1) |
| Yes                                                   | 128  | (8.0)  | 104  | (84.6) | 19  | (15.4) |
| <i>Witness to violence &lt;12 months</i>              |      |        |      |        |     |        |
| No                                                    | 1341 | (83.2) | 1104 | (90.9) | 111 | (9.1)  |
| Yes                                                   | 271  | (16.8) | 207  | (81.2) | 48  | (18.8) |
| <i>Hazardous alcohol use</i>                          |      |        |      |        |     |        |
| No                                                    | 963  | (55.2) | 793  | (87.7) | 111 | (12.3) |
| Yes                                                   | 782  | (44.8) | 656  | (89.1) | 80  | (10.9) |
| <i>Smoking</i>                                        |      |        |      |        |     |        |
| Non-smoker <sup>c</sup>                               | 802  | (45.5) | 659  | (93.3) | 47  | (6.7)  |
| Current smoker                                        | 962  | (54.5) | 743  | (84.6) | 135 | (15.4) |
| <i>Amphetamine use</i>                                |      |        |      |        |     |        |
| No                                                    | 1650 | (92.5) | 1334 | (90.2) | 145 | (9.8)  |
| Yes                                                   | 133  | (7.5)  | 94   | (74.0) | 33  | (26.0) |
| <i>Cannabis use</i>                                   |      |        |      |        |     |        |
| No                                                    | 1399 | (76.2) | 1128 | (91.1) | 110 | (8.9)  |
| Yes                                                   | 437  | (23.8) | 340  | (81.3) | 78  | (18.7) |
| <i>Opiate use</i>                                     |      |        |      |        |     |        |
| No                                                    | 1689 | (95.7) | 1354 | (89.4) | 161 | (10.6) |
| Yes                                                   | 75   | (4.3)  | 58   | (80.6) | 14  | (19.4) |
| <i>Cared for by someone else</i>                      |      |        |      |        |     |        |
| No                                                    | 931  | (84.4) | 734  | (87.6) | 104 | (12.4) |
| Yes                                                   | 172  | (15.6) | 118  | (84.9) | 21  | (15.1) |
| <i>Children</i>                                       |      |        |      |        |     |        |
| No                                                    | 340  | (31.5) | 269  | (82.8) | 56  | (17.2) |
| Yes                                                   | 738  | (68.5) | 625  | (89.5) | 73  | (10.5) |
| <i>Single parent</i>                                  |      |        |      |        |     |        |
| No                                                    | 953  | (77.7) | 783  | (86.8) | 119 | (13.2) |
| Yes                                                   | 273  | (22.3) | 225  | (87.2) | 33  | (12.8) |
| <i>Community activity participation &lt;12 months</i> |      |        |      |        |     |        |
| No                                                    | 888  | (57.0) | 710  | (86.7) | 109 | (13.3) |
| Yes                                                   | 670  | (43.0) | 554  | (92.2) | 47  | (7.8)  |
| <i>Exercise</i>                                       |      |        |      |        |     |        |
| No                                                    | 738  | (41.0) | 550  | (85.7) | 92  | (14.3) |
| Yes                                                   | 1060 | (59.0) | 877  | (90.0) | 97  | (10.0) |
| <i>Participation in sport</i>                         |      |        |      |        |     |        |
| No                                                    | 1507 | (83.9) | 1183 | (87.6) | 168 | (12.4) |
| Yes                                                   | 290  | (16.4) | 249  | (92.6) | 20  | (7.4)  |

Note: <sup>a</sup>Both represents Aboriginal and Torres Strait Islander; <sup>b</sup>Other includes unemployed, pension, studying, pair carer; <sup>c</sup>includes ex-smokers.

1. Islam, M.M.; Oni, H.T.; Lee, K.S.K.; Hayman, N.; Wilson, S.; Harrison, K., Hummerston, B.; Ivers, R.; Conigrave, K.M. Standardised alcohol screening in primary health care services targeting Aboriginal and Torres Strait Islander peoples in Australia. *Addict Sci Clin Pract* **2018**, *13*, 5.
2. Kowal, E.; Gunthorpe, W.; Bailie, R.S. Measuring emotional and social wellbeing in Aboriginal and Torres Strait Islander populations: an analysis of a Negative Life Events Scale. *Int J Equity Health* **2007**, *6*, 18.
